# Supplementary material for: Construction of a molybdenum and copper co-doped nickel phosphide with lattice distortion for highly efficient electrochemical water splitting
Source: Royal Society of Chemistry journal article supplement (doi:10.1039/d1dt02019f), 2021-01-01
Supplement: d1dt02019f1.pdf [file d1dt02019f1.pdf]

**Construction of a molybdenum and copper co-doped nickel  
phosphide with lattice distortion for highly efficient electrochemical  
water splitting**

Jiefei Li<sup>a</sup>, Zehao Zhang <sup>a</sup>, Xueqiong Zhang <sup>a</sup>, Linjie Xu <sup>a</sup>, Songyuan  
Yuan<sup>a</sup>, Hang Wei<sup>a\*</sup>, Haibin Chu <sup>a\*</sup>,

<sup>a</sup> College of Chemistry and Chemical Engineering, Inner Mongolia  
Engineering and Technology Research Center for Catalytic Conversion  
and Utilization of Carbon Resource Molecules, Inner Mongolia  
University, Hohhot 010021, China. E-mail: weihang@imu.edu.cn  
E-mail: [chuhb@imu.edu.cn](mailto:chuhb@imu.edu.cn)

## Experimental Section

### Materials

Ni foam (thickness of 1.0 mm) was purchased from Jiashide Foam Metal Co., Ltd., Suzhou. Acetone (99.9%), ethanol (99.9%), HCl (37%),  $\text{NiCl}_2 \cdot 6\text{H}_2\text{O}$ ,  $\text{Cu}(\text{NO}_3)_2 \cdot 3\text{H}_2\text{O}$ ,  $(\text{NH}_4)_6\text{Mo}_7\text{O}_{24} \cdot 4\text{H}_2\text{O}$ , urea, and  $\text{NH}_4\text{F}$  were purchased from Sinopharm Group Co., Ltd. Pt/C (20 wt %) and Nafion (5 wt %) were purchased from Johnson Matthey.  $\text{RuO}_2$  was purchased from Sigma-Aldrich.

### Pretreatment of Ni foam

Nickel foam (2.0 cm×2.4 cm×0.1 cm) was ultrasonically cleaned with 3 M HCl solution for 30 min, and subsequently rinsed with acetone, ethanol, and deionized water three times to remove the nickel oxides on the surface.

### Preparation of Mo,Cu-Ni(OH)<sub>2</sub>@NF, Mo-Ni(OH)<sub>2</sub>@NF, Cu-Ni(OH)<sub>2</sub>@NF, and Ni(OH)<sub>2</sub>@NF

The in-situ growth of Mo,Cu-Ni(OH)<sub>2</sub>@NF was accomplished through the one-step hydrothermal reaction, in which pretreated Ni foam and a mixed solution of  $\text{NiCl}_2 \cdot 6\text{H}_2\text{O}$  (0.265 g),  $\text{Cu}(\text{NO}_3)_2 \cdot 3\text{H}_2\text{O}$  (0.096 g),  $(\text{NH}_4)_6\text{Mo}_7\text{O}_{24} \cdot 4\text{H}_2\text{O}$  (0.071 g), urea (0.48 g), and  $\text{NH}_4\text{F}$  (0.22 g) in 30 mL of deionized water were transferred to a Teflon-lined stainless steel reactor and heated at 120°C for 10 h, then vacuum dried via a freeze-drying method. At last, we could obtain Mo, Cu-Ni(OH)<sub>2</sub>@NF flexible electrode. For comparison, Mo-Ni(OH)<sub>2</sub>@NF, Cu-Ni(OH)<sub>2</sub>@NF, and Ni(OH)<sub>2</sub>@NF were prepared following the same procedures except using the different metal precursors.

### Preparation of Mo,Cu-Ni<sub>2</sub>P@NF, Mo-Ni<sub>2</sub>P@NF, Cu-Ni<sub>2</sub>P@NF, and Ni<sub>2</sub>P@NF

To prepare the Mo,Cu-Ni<sub>2</sub>P@NF, a low-temperature phosphorization method was employed here. A certain amount of  $\text{NaH}_2\text{PO}_2$  and the as-prepared Mo,Cu-Ni(OH)<sub>2</sub>@NF were placed in two quartz boats individually, and then placed in two separate positions within the tube furnace. Afterward, the samples were heated at 350 °C for 3 h with a heating rate of 2 °C min<sup>-1</sup> under Ar flow atmosphere. Mo,Cu-Ni<sub>2</sub>P@NF was obtained after cooled to room temperature. For comparison, Mo-Ni<sub>2</sub>P@NF, Cu-Ni<sub>2</sub>P@NF, and Ni<sub>2</sub>P@NF were prepared following the same

procedures.

### **Electrochemical measurements**

All the electrochemical measurements were performed on CHI 760 electrochemistry workstation. The working electrode was a Ni foam modified by catalyst (1 cm×1 cm), saturated calomel electrode and graphite rod were used as the reference and counter electrode, respectively. The polarization curves were obtained using linear sweep voltammetry (LSV) for HER and OER in 1.0 M KOH solution (pH =14) at the scanning rate of 5 mV/s. The Tafel plots were derived from the OER and HER polarization curves (2 mV/s) and constructed by the Tafel equation. The chronopotentiometric (CP) measurements were conducted to evaluate their durability. Electrochemical impedance spectra (EIS) were obtained in the frequency from 1 M Hz to 0.01 Hz in the 1.0 M KOH. The electrochemically active surface area (ECSA) can be calculated through the electrochemical double-layer capacitance ( $C_{dl}$ ) with cyclic voltammetry (CV) plots in a non-Faradaic region. The CV curves were got with different scan rates (20, 40, 60, 80, and 100 mV/s) in the potential range (0.7-0.27 V versus RHE) for HER and (1.00 -1.20 V versus RHE) for OER to calculate  $C_{dl}$ . The plot of diverse scan rates versus the corresponding current density ( $j$ ) between the anode and cathode ( $j = j_{anodic} - j_{cathodic}$ )/2 can estimate the  $C_{dl}$  by their linear slope. The electrocatalytic performances for overall water splitting were measured by employing prepared catalysts as working electrodes for both OER and HER. The RuO<sub>2</sub> and Pt/C catalysts were used as the baseline catalysts for all the electrochemical measurements. All the potentials exhibited in this paper were calculated by the Nernst equation:  $E_{RHE} = E_{SCE} + 0.242 \text{ V} \times 0.059 \text{ pH}$ .

### **Catalyst characterizations**

The Powder X-ray diffraction (XRD) patterns were performed on PANalytical Empyrean diffractometer operated at 40 kV and 40 mA using Cu K $\alpha$  radiation. X-ray photoelectron spectroscopy (XPS) analysis was operated on a THS-103X spectrometer equipped with an Al K $\alpha$  X-ray source (1486.6 eV). Transmission electron microscopy (TEM) characterization was acquired on a FEI Tecnai F20 system with an accelerating voltage of 200 kV. The size and morphology of the

catalysts were observed by Field Emission Scanning Electron Microscopy (FE-SEM) (Hitachi, Models-4800).

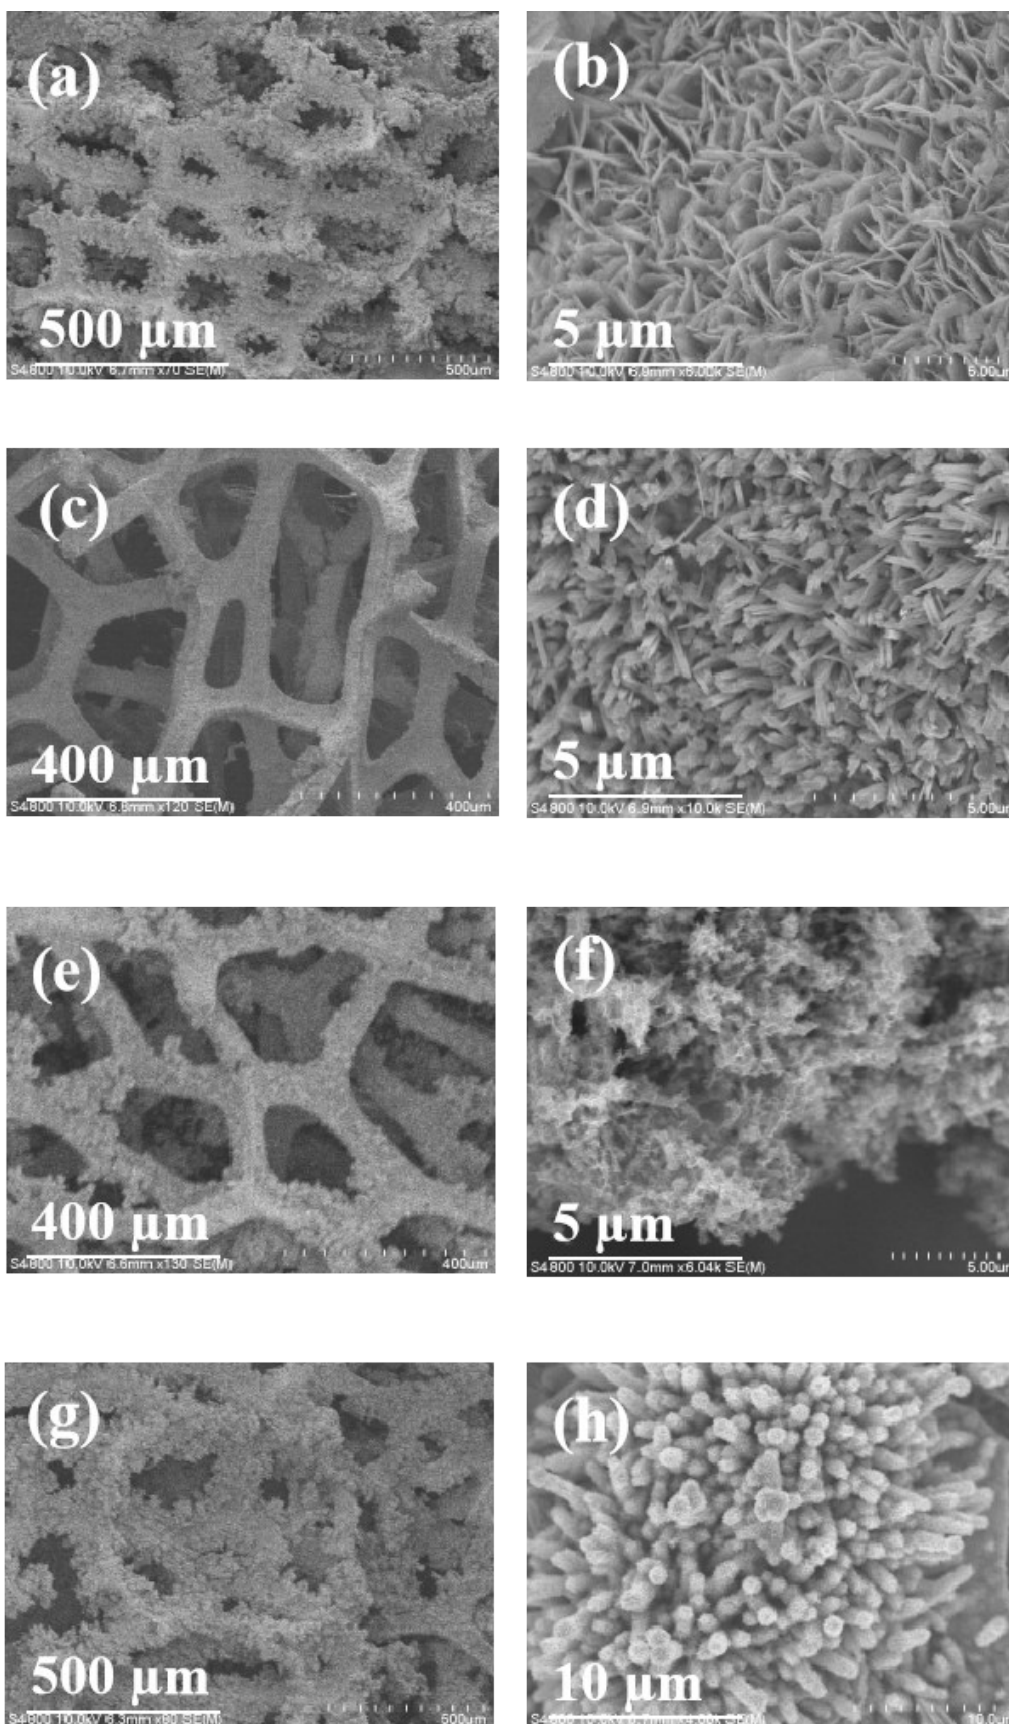

Fig.S1 SEM images of (a,b)  $\text{Ni}_2\text{P}@NF$ , (c,d)  $\text{Mo-Ni}_2\text{P}@NF$ , (e,f)  $\text{Cu-Ni}_2\text{P}@NF$ , (g,h)  $\text{Mo,Cu-Ni}_2\text{P}@NF$ .

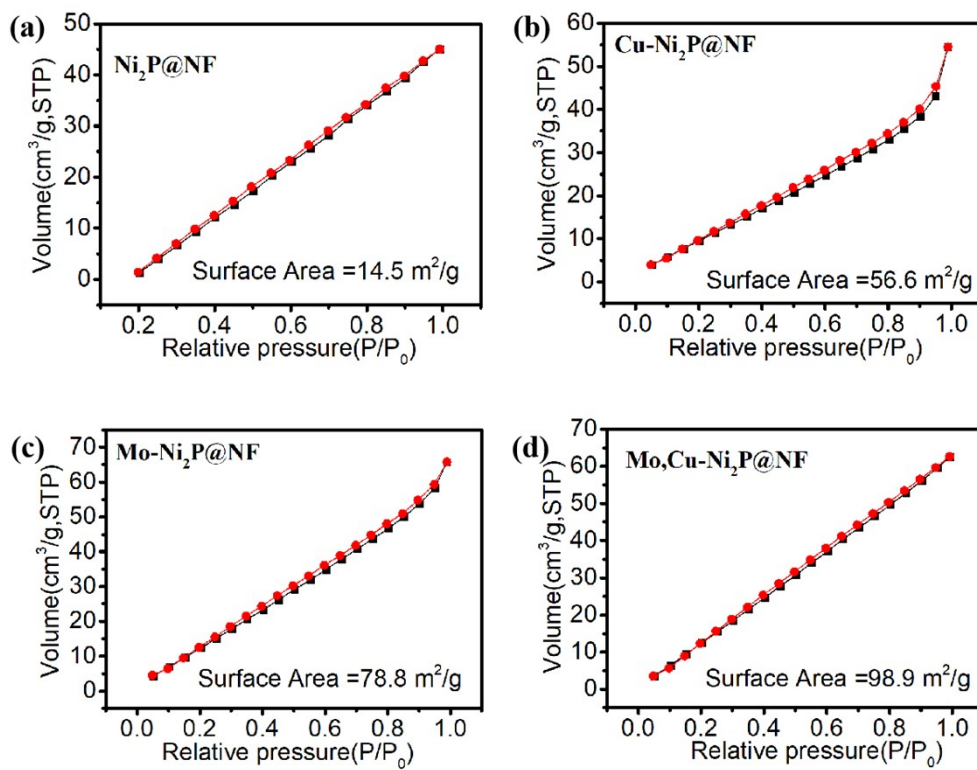

Fig.S2 The  $\text{N}_2$  adsorption-desorption isotherm curves of  $\text{Ni}_2\text{P}@NF$ ,  $\text{Cu-Ni}_2\text{P}@NF$ ,  $\text{Mo-Ni}_2\text{P}@NF$ , and  $\text{Mo,Cu-Ni}_2\text{P}@NF$ .

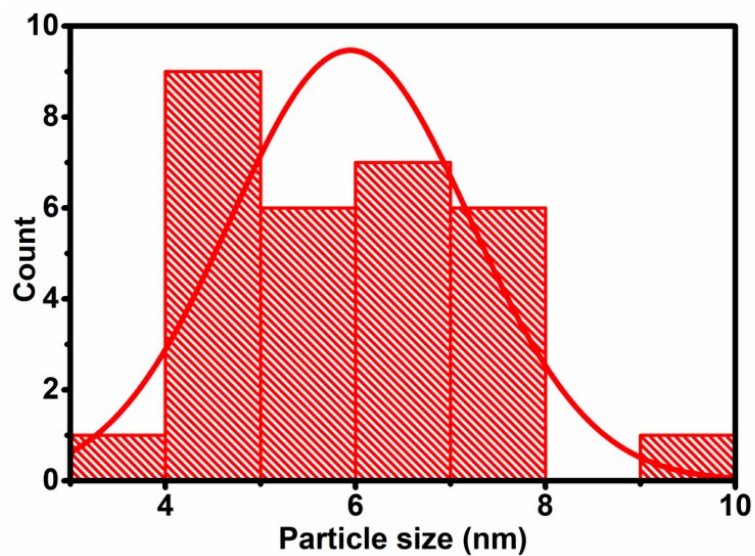

Fig.S3 Particle diameter distributions of  $\text{Mo,Cu-Ni}_2\text{P}$  nanoparticles.

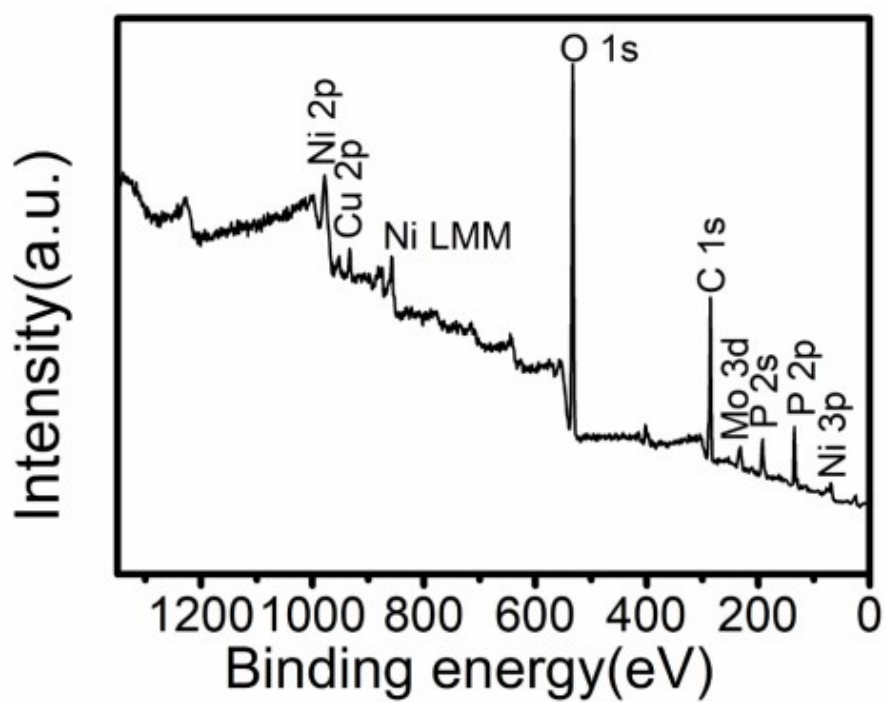

Fig.S4 The XPS spectrum of Mo,Cu-Ni<sub>2</sub>P@NF.

Table S1 Valence analysis results derived from XPS spectra of the as-prepared electrocatalyst.

| Sample                     | Ni <sup>δ+</sup><br>(%) | P <sup>δ+</sup><br>(%) | Mo <sup>6+</sup><br>(%) | Cu <sup>+</sup><br>(%) |
|----------------------------|-------------------------|------------------------|-------------------------|------------------------|
| Ni <sub>2</sub> P@NF       | 33.3                    | 38.4                   | -                       |                        |
| Cu-Ni <sub>2</sub> P@NF    | 19.2                    | 22.7                   | -                       | 70.8                   |
| Mo-Ni <sub>2</sub> P@NF    | 10.6                    | 10.8                   | 21.8                    |                        |
| Mo,Cu-Ni <sub>2</sub> P@NF | 8.95                    | 9.3                    | 35.7                    | 100                    |

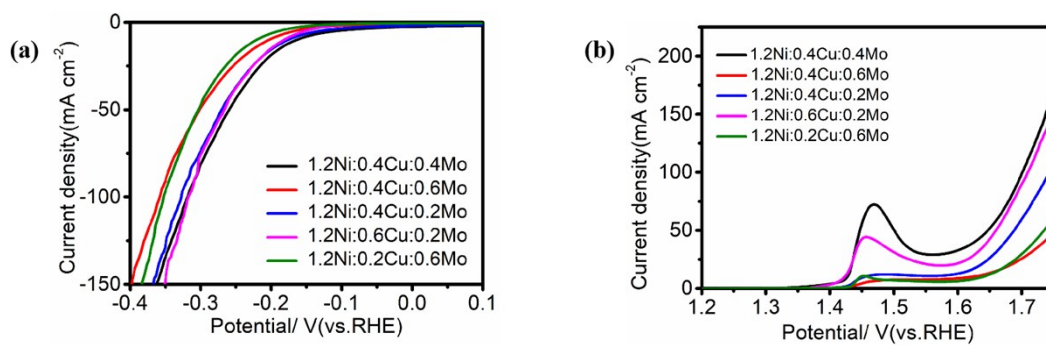

Fig. S5 HER and OER polarization curves of Mo,Cu-Ni<sub>2</sub>P@NF with different Mo,Cu stoichiometry.

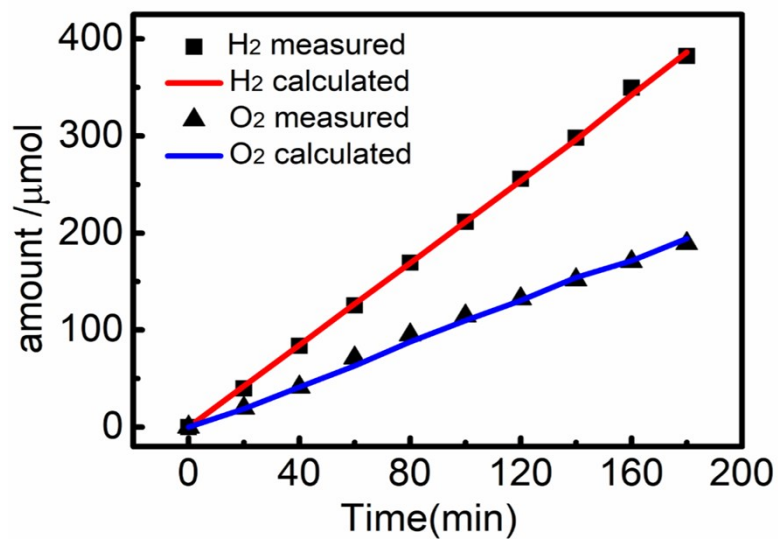

Fig. S6 The amount of H<sub>2</sub> and O<sub>2</sub> (theoretically calculated and experimentally measured) vs. time for hydrogen evolution reaction and oxygen evolution reaction.



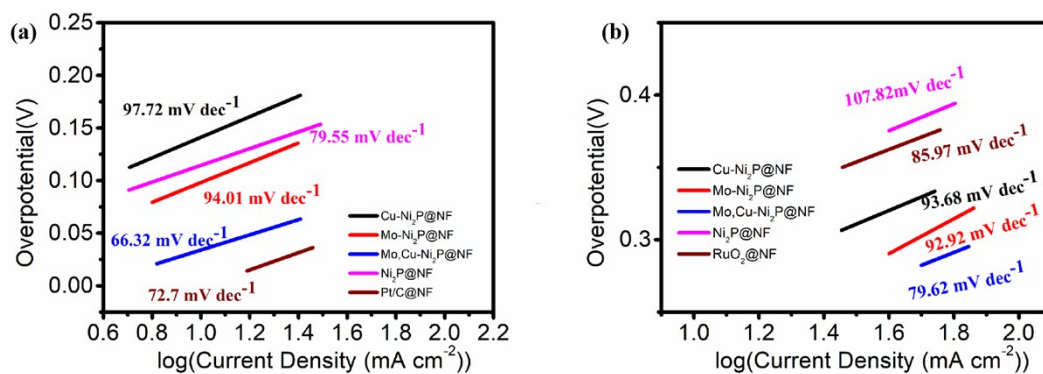

Fig. S7 Tafel plots of Ni<sub>2</sub>P, Cu-Ni<sub>2</sub>P, Mo-Ni<sub>2</sub>P, Mo,Cu-Ni<sub>2</sub>P, Pt/C, and RuO<sub>2</sub> in HER (a) and OER (b) process in 1.0 M KOH.

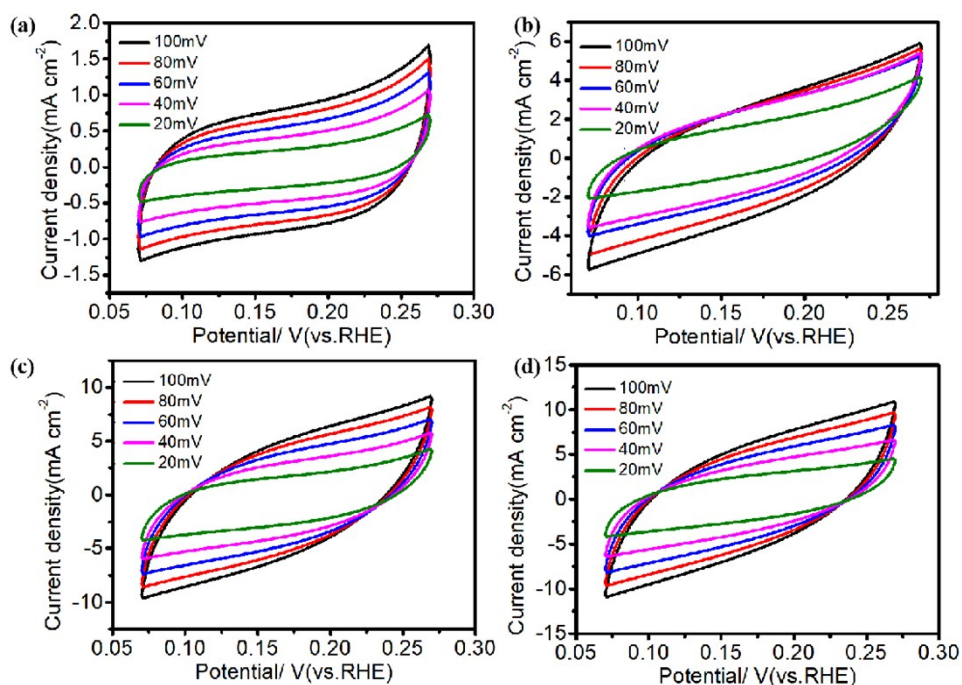

Fig. S8 Cyclic voltammograms of (a) Ni<sub>2</sub>P, (b) Cu-Ni<sub>2</sub>P, (c) Mo-Ni<sub>2</sub>P, and (d) Mo,Cu-Ni<sub>2</sub>P, measured in a potential window without Faradaic process at different scan rates: 20, 40, 60, 80 and 100 mV s<sup>-1</sup> in the potential range of 1.00 V to 1.20 V vs RHE.

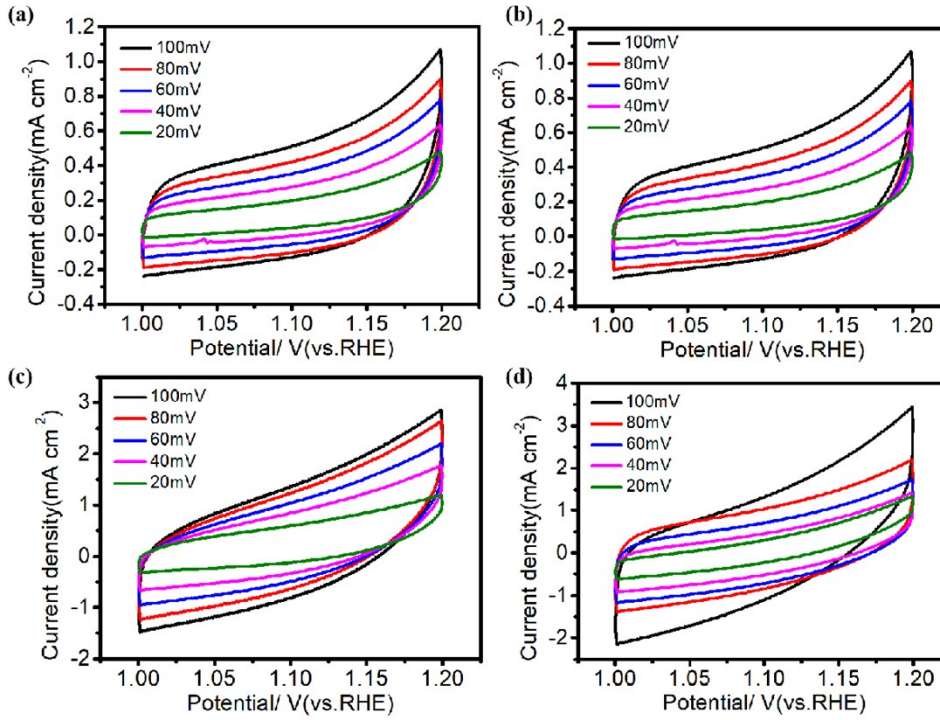

Fig. S9 Cyclic voltammograms of (a) Ni<sub>2</sub>P, (b) Cu-Ni<sub>2</sub>P, (c) Mo-Ni<sub>2</sub>P, and (d) Mo,Cu-Ni<sub>2</sub>P, measured in a potential window without Faradaic process at different scan rates: 20, 40, 60, 80 and 100 mV s<sup>-1</sup> in the potential range of 1.00 V to 1.20 V vs RHE.

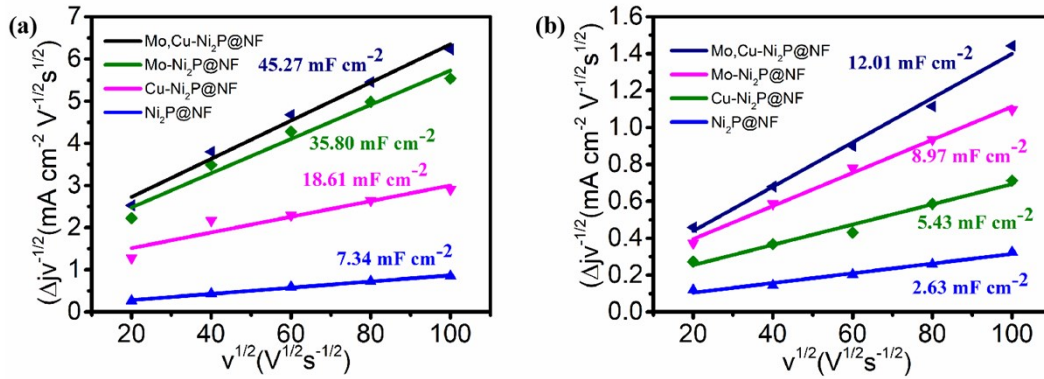

Fig. S10 The double-layer capacitance of Ni<sub>2</sub>P, Cu-Ni<sub>2</sub>P, Mo -Ni<sub>2</sub>P, and Mo,Cu-Ni<sub>2</sub>P in HER (a) and OER (b) process in 1.0 M KOH.

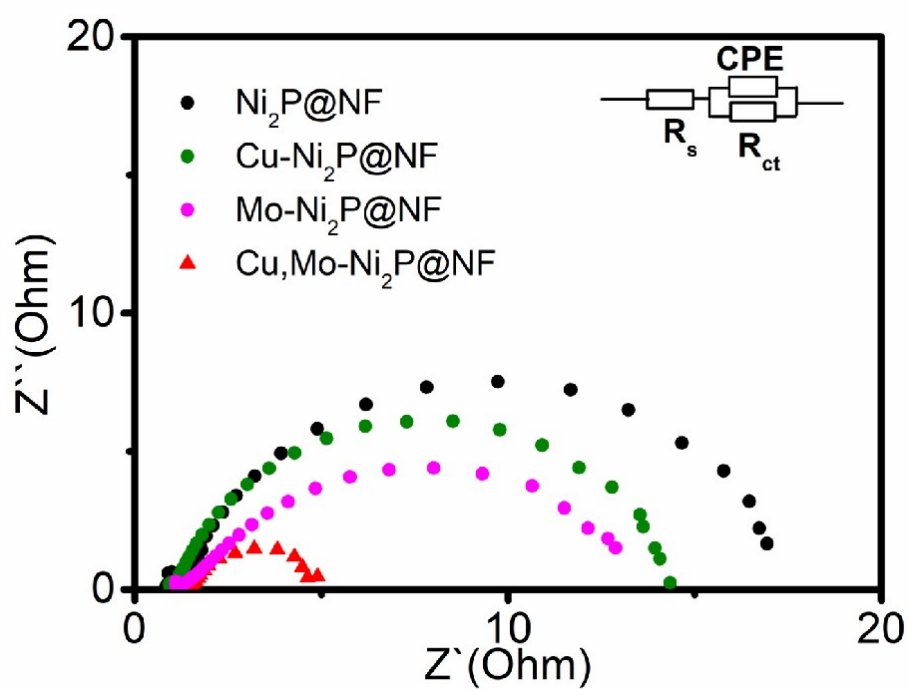

Fig. S11 Nyquist plots of  $\text{Ni}_2\text{P@NF}$ ,  $\text{Cu-Ni}_2\text{P@NF}$ ,  $\text{Mo-Ni}_2\text{P@NF}$ , and  $\text{Mo,Cu-Ni}_2\text{P@NF}$ .

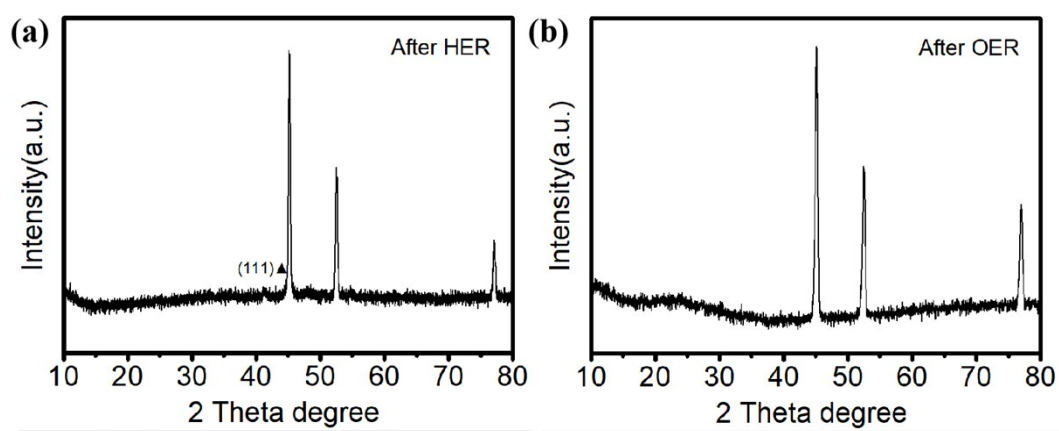

Fig. S12 XRD spectra of  $\text{Mo,Cu-Ni}_2\text{P@NF}$  after stability testing.

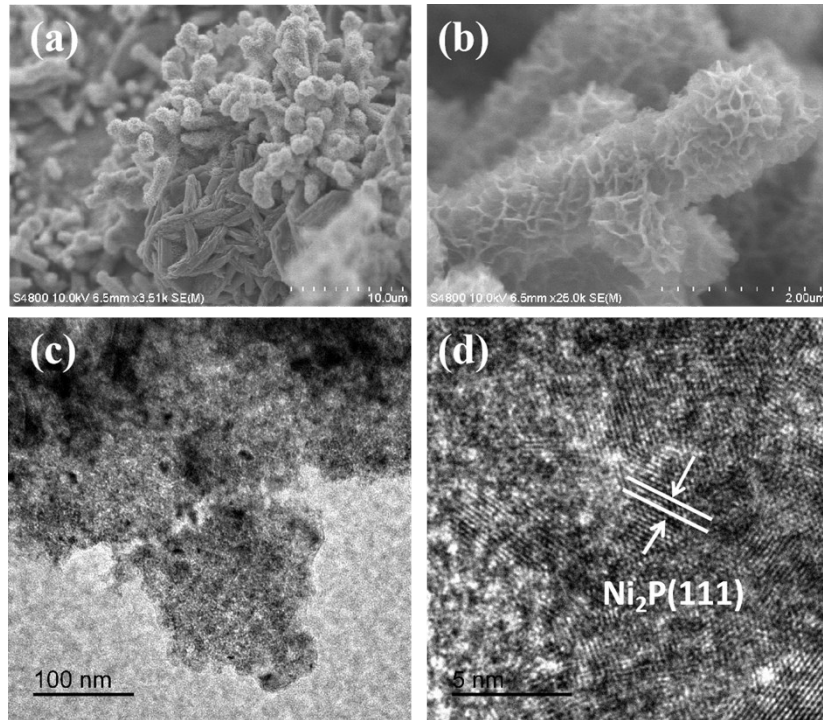

Fig. S13. (a) SEM and (b)TEM images of Mo,Cu-Ni<sub>2</sub>P@NF after 20 h HER stability testing.

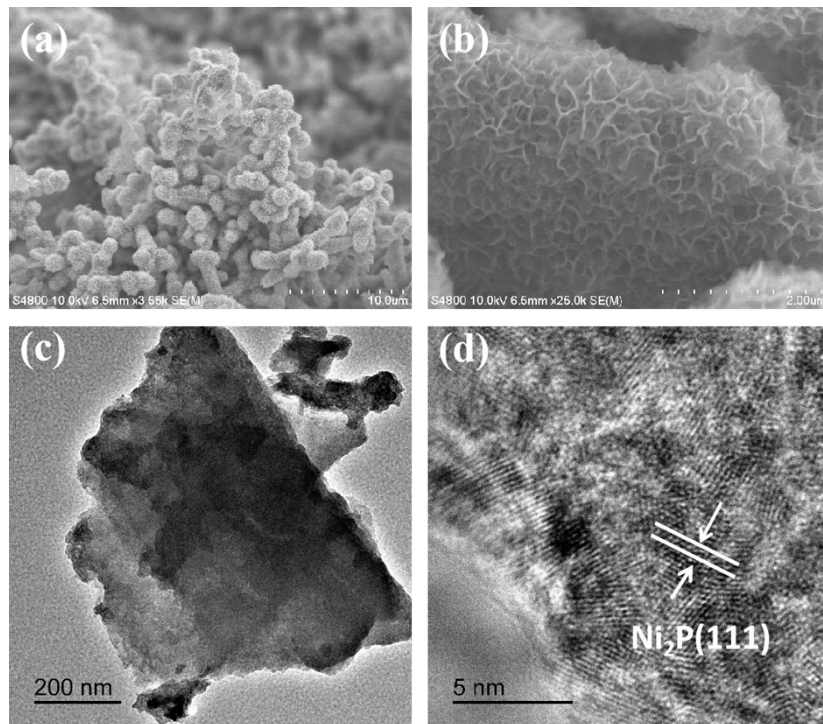

Fig. S14. (a) SEM and (b)TEM images of Mo,Cu-Ni<sub>2</sub>P@NF after 20 h OER stability testing.

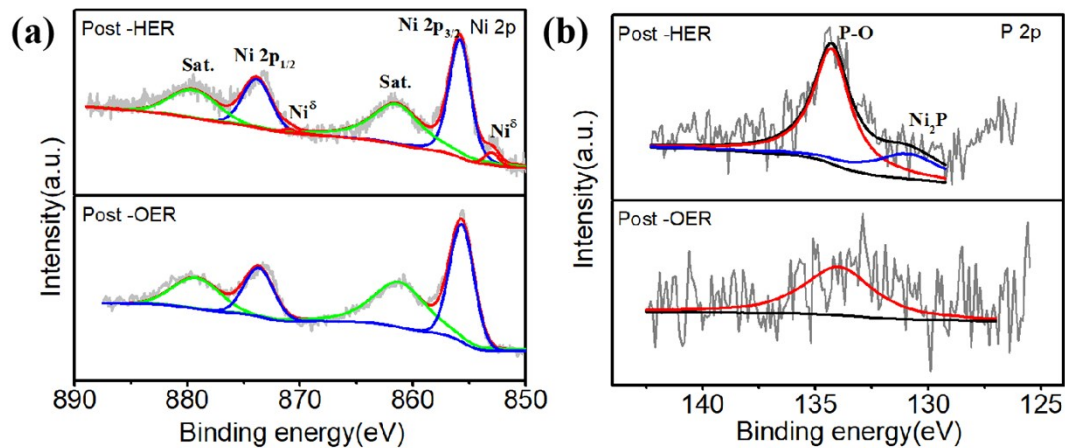

Fig. S15 XPS spectra of Mo,Cu-Ni<sub>2</sub>P@NF after stability testing.

Table S2. Comparison of recent nickel-based electrocatalysts for HER in alkaline electrolytes.

| Catalysts                                                           | Electrolyte | Overpotential ( $\eta$ ) | Current density ( $i_0$ ) | Tafel slope (b)            | Ref       |
|---------------------------------------------------------------------|-------------|--------------------------|---------------------------|----------------------------|-----------|
| Mo,Cu-Ni <sub>2</sub> P@NF                                          | 1 M KOH     | 34 mV                    | 10 mA cm <sup>-2</sup>    | 66.32 mV dec <sup>-1</sup> | This work |
| NiP/NF                                                              | 1 M KOH     | 102 mV                   | 10 mA cm <sup>-2</sup>    | 90 mV dec <sup>-1</sup>    | [1]       |
| NiP <sub>0.62</sub> S <sub>0.38</sub>                               | 1 M KOH     | 52 mV                    | 10 mA cm <sup>-2</sup>    | 52.3 mV dec <sup>-1</sup>  | [2]       |
| Ni <sub>90</sub> P <sub>10</sub> /Ti                                | 1 M KOH     | 212 mV                   | 10 mA cm <sup>-2</sup>    | 75.4 mV dec <sup>-1</sup>  | [3]       |
| Ni-P/CF                                                             | 1 M KOH     | 98 mV                    | 10 mA cm <sup>-2</sup>    | 55 mV dec <sup>-1</sup>    | [4]       |
| Mo-Ni <sub>2</sub> P nanowires                                      | 1 M KOH     | 78 mV                    | 10 mA cm <sup>-2</sup>    | 109 mV dec <sup>-1</sup>   | [5]       |
| Ni/Ni <sub>8</sub> P <sub>3</sub>                                   | 1 M KOH     | 130mV                    | 10 mA cm <sup>-2</sup>    | 58.5 mV dec <sup>-1</sup>  | [6]       |
| Ni/NiS                                                              | 1 M KOH     | 230mV                    | 10 mA cm <sup>-2</sup>    | 123.3 mV dec <sup>-1</sup> | [6]       |
| Ni <sub>2</sub> P/Ni <sub>3</sub> S <sub>2</sub> HNAs<br>nanoflakes | 1 M KOH     | 80 mV                    | 10 mA cm <sup>-2</sup>    | 65 mV dec <sup>-1</sup>    | [7]       |
| Ni <sub>2</sub> P/MoO <sub>2</sub> @MoS <sub>2</sub>                | 1 M KOH     | 159mV                    | 10 mA cm <sup>-2</sup>    | 77 mV dec <sup>-1</sup>    | [8]       |
| Ni-Co-P/NF                                                          | 1 M KOH     | 160mV                    | 10 mA cm <sup>-2</sup>    | 108mV dec <sup>-1</sup>    | [10]      |
| P/Ni(OH) <sub>2</sub> /NiMoO <sub>4</sub>                           | 1 M KOH     | 60 mV                    | 10 mA cm <sup>-2</sup>    | 130 mV dec <sup>-1</sup>   | [11]      |
| NiCoFe phosphate<br>NSs-C/NF                                        | 1 M KOH     | 231 mV                   | 10 mA cm <sup>-2</sup>    | 86 mV dec <sup>-1</sup>    | [12]      |
| Ni <sub>2</sub> P/rGO                                               | 1 M KOH     | 142 mV                   | 10 mA cm <sup>-2</sup>    | 58 mV dec <sup>-1</sup>    | [13]      |
| NiP/NiFeP/C                                                         | 1 M KOH     | 87 mV                    | 10 mA cm <sup>-2</sup>    | 38mV dec <sup>-1</sup>     | [14]      |

|                        |         |        |                        |                           |      |
|------------------------|---------|--------|------------------------|---------------------------|------|
| NiP <sub>2</sub> -Fe-2 | 1 M KOH | 86 mV  | 10 mA cm <sup>-2</sup> | 63.1 mV dec <sup>-1</sup> | [15] |
| NFNS@NiP@Plate,        | 1 M KOH | 243 mV | 10 mA cm <sup>-2</sup> | 141 mV dec <sup>-1</sup>  | [16] |
| NiFeCoP/NM             | 1 M KOH | 33 mV  | 10 mA cm <sup>-2</sup> | 71.1 mV dec <sup>-1</sup> | [17] |

Table S3. Comparison of recent nickel-based electrocatalysts for OER in alkaline electrolytes.

| Catalysts                                                           | Electrolyte | Overpotential ( $\eta$ ) | Current density ( $i_0$ ) | Tafel slope (b)            | Ref       |
|---------------------------------------------------------------------|-------------|--------------------------|---------------------------|----------------------------|-----------|
| Mo,Cu-Ni <sub>2</sub> P@NF                                          | 1 M KOH     | 341 mV                   | 100 mA cm <sup>-2</sup>   | 79.62 mV dec <sup>-1</sup> | This work |
| NiP/NF                                                              | 1 M KOH     | 320 mV                   | 10 mA cm <sup>-2</sup>    | 78 mV dec <sup>-1</sup>    | [1]       |
| NiP <sub>0.62</sub> S <sub>0.38</sub>                               | 1 M KOH     | 270 mV                   | 10 mA cm <sup>-2</sup>    | -                          | [2]       |
| Ni-P/CF                                                             | 1 M KOH     | 325 mV                   | 10 mA cm <sup>-2</sup>    | 120 mV dec <sup>-1</sup>   | [4]       |
| Ni/Ni <sub>8</sub> P <sub>3</sub>                                   | 1 M KOH     | 270 mV                   | 10 mA cm <sup>-2</sup>    | 73.2 mV dec <sup>-1</sup>  | [6]       |
| Ni/NiS                                                              | 1 M KOH     | 340 mV                   | 10 mA cm <sup>-2</sup>    | 109.8 mV dec <sup>-1</sup> | [6]       |
| Ni <sub>2</sub> P/Ni <sub>3</sub> S <sub>2</sub> HNAs<br>nanoflakes | 1 M KOH     | 240 mV                   | 10 mA cm <sup>-2</sup>    | 62 mV dec <sup>-1</sup>    | [7]       |
| Ni <sub>2</sub> P/MoO <sub>2</sub> @MoS <sub>2</sub>                | 1 M KOH     | 280 mV                   | 10 mA cm <sup>-2</sup>    | 85 mV dec <sup>-1</sup>    | [8]       |
| Ni-Co-P/NF                                                          | 1 M KOH     | 350 mV                   | 20 mA cm <sup>-2</sup>    | 324.6 mV dec <sup>-1</sup> | [10]      |
| P/Ni(OH) <sub>2</sub> /NiMoO <sub>4</sub>                           | 1 M KOH     | 270 mV                   | 10 mA cm <sup>-2</sup>    | -                          | [12]      |
| NiCoFe phosphate<br>NSs-C/NF                                        | 1 M KOH     | 240 mV                   | 10 mA cm <sup>-2</sup>    | 58 mV dec <sup>-1</sup>    | [13]      |
| Ni <sub>2</sub> P/rGO                                               | 1 M KOH     | 260 mV                   | 10 mA cm <sup>-2</sup>    | 62 mV dec <sup>-1</sup>    | [14]      |
| NiP/NiFeP/C                                                         | 1 M KOH     | 300 mV                   | 10 mA cm <sup>-2</sup>    | 81 mV dec <sup>-1</sup>    | [15]      |
| NFNS@NiP@Plate,                                                     | 1 M KOH     | 197 mV                   | 10 mA cm <sup>-2</sup>    | 51 mV dec <sup>-1</sup>    | [16]      |
| NiFeCoP/NM                                                          | 1 M KOH     | 277 mV                   | 10 mA cm <sup>-2</sup>    | 48.9 mV dec <sup>-1</sup>  | [17]      |
| Ni <sub>2</sub> P <sub>2</sub> O <sub>7</sub> ·8H <sub>2</sub> O/SS | 1 M KOH     | 239 mV                   | 10 mA cm <sup>-2</sup>    | 51.5 mV dec <sup>-1</sup>  | [18]      |
| Ni <sub>2</sub> P/VP <sub>2</sub> /NF                               | 1 M KOH     | 220 mV                   | 10 mA cm <sup>-2</sup>    | 49 mV dec <sup>-1</sup>    | [19]      |

## Reference:

[1] Z. Yuan, C. Chen, Z. Hu, *J. Energy Chem.* 2017, **26**, 1196.

[2] J. Luo, D. Li, F. Tian, *J. Mater. Chem. A.* 2017, **5**, 14865.

- [3] C. Li, Y. Zhang, S. Lu, *Chem. Commun.* 2018, **54**, 12408.
- [4] C. Li, S. Gu, Q. Liu, *J. Power Sources.* 2015, **299**, 342.
- [5] Y. Sun, L. Hang, Q. Shen, *Nanoscale* 2017, **9**, 16674.
- [6] F. Gao, T. Chen, M. Yi, L. Qing, *Adv. Funct. Mater.* 2016, **26**, 3314.
- [7] X. Wang, Y. Liu, Y. Pan, *Nano Energy* 2018, **51**, 26.
- [8] D. Zhao, H. Wang, C. Selomulya, *Nanoscale* 2017, **9**, 17349.
- [9] W. Cheng, H. Zhang, Q. Liu, *J. Mater. Chem. A.* 2018, **6**, 9420.
- [10] Y. Gong, J. Wang, Z. Xu, *J. Mater. Chem. A.* 2018, **6**, 12506.
- [11] Y. Li, H. Tan, W. Xi, G. Yan, *Dalton Tran.* 2018, **47**, 8787.
- [12] H. Lin, X. Wang, *Nanoscale* 2018, **101**, 2975.
- [13] L. Yan, L. Li, X. Zhao, *J. Mater. Chem. A.* 2019, **6**, 1682.
- [14] Y. Yan, B. Weng, *J. Mater. Chem. A.* 2019, **7**, 7168.
- [15] M. Pi, S. Chen, J. Li, *ACS Appl. Mater Interfaces.* 2019, **11**, 14059.
- [16] J. Ding, E. Peng, X. Su, X. Li, *Adv. Sci.* 2019, **6**, 1801670.
- [17] C. Zhao, M. Zhou, Q. Sun, Z. Wan, *Electrochim. Acta* 2019, **306**, 651.
- [18] U. Patil, S. Marje, P. Katkar, *J. Alloys. Compd.* 2019, **779**, 49.
- [19] H. Fu, C. Tian, X. Zhang, *Adv. Mater.* 2019, **31**, 1901174.
